# Supplementary material for: The two cathepsin B-like proteases of Arabidopsis thaliana are closely related enzymes with discrete endopeptidase and carboxydipeptidase activities
Source: publisher site journal article supplement (doi:10.1515/hsz-2018-0186), 2018-06-20
Supplement: Supplementary file 1 [file hsz-2018-0186_suppl.zip]

**The two cathepsin B-like proteases of *Arabidopsis thaliana* are closely related enzymes with discrete endopeptidase and carboxydipeptidase activities**

Andreas Porodko, Ana Cirnski, Drazen Petrov, Teresa Raab, Melanie Paireder, Bettina Mayer, Daniel Maresch, Lisa Nika, Martin L. Biniossek, Patrick Gallois, Oliver Schilling, Chris Oostenbrink, Marko Novinec and Lukas Mach

**Supplementary material**

Table S1 Polypeptide sequences encoded by AtCathB1 splice variants.

AtCathB1 (UniProt: F4HVZ1):

MADSCCIRLHLLASVFLLLFSSFNLQGIAAE[LSKQKLTSLILQNEIVKEVNENPNAGWKAAFNDRFA]  
[ATVAEFKRLLGVIQTPKTAYLGVPIVRHDL]SLK↓LPKEFDARTAWSHCTSIRRIL[VG]YILNNVLLWSTITL  
[WFW]LLGHCGS[C]WAFGAVESLSDRFCIKYNL[N]VSLSANDVIACCGLLCGFGCNGGFPMGAWLYFKYH  
GVVTQECPYFDNTGCSHPGCEPTYTPKCERKCVSRNQLWGESKHYGVGAYRINPDPQDIMAEEVYKN  
GPVEVAFTVYEDFAHYKSGVYKYITGTKIGGH[AV]KLIGWGTSDDGEDYWLLA[NQW][N]RSWGDDGYFK  
IRRGTNECGIEQSVVAGLPSEKNVFKGITTSDDLLVSSV

AtCathB1 (open reading frame of transcript retaining introns 4 and 5):

MADSCCIRLHLLASVFLLLFSSFNLQGIAAE[LSKQKLTSLILQNEIVKEVNENPNAGWKAAFNDRFA]  
[ATVAEFKRLLGVIQTPKTAYLGVPIVRHDL]SLK↓LPKEFDARTAWSHCTSIRRILGRF

AtCathB1 (open reading frame of transcript retaining intron 5):

MADSCCIRLHLLASVFLLLFSSFNLQGIAAE[LSKQKLTSLILQNEIVKEVNENPNAGWKAAFNDRFA]  
[ATVAEFKRLLGVIQTPKTAYLGVPIVRHDL]SLK↓LPKEFDARTAWSHCTSIRRILDQVKHHFI

AtCathB1 (open reading frame of transcript with truncated exon 6):

MADSCCIRLHLLASVFLLLFSSFNLQGIAAE[LSKQKLTSLILQNEIVKEVNENPNAGWKAAFNDRFA]  
[ATVAEFKRLLGVIQTPKTAYLGVPIVRHDL]SLK↓LPKEFDARTAWSHCTSIRRILDQVLHQI

Proregions are presented in magenta. The insertion present in UniProt entry F4HVZ1 is shown in cyan. Important active-site residues (yellow) and potential N-glycosylation sites (green) are highlighted by coloured backgrounds. The N-terminus of the catalytic domain is indicated by a red arrow.

Table S2 Sequences of AtCathB2 and AtCathB3.

AtCathB2:

MADNCIRLLHSASVFFCLGLLISSFNLLQGIAAE<sup>1</sup>LSKQKLT<sup>2</sup>SWILQNEIVKEVNENPNAGWKASFNDRF<sup>3</sup>  
A<sup>4</sup>ATVAEFKRL<sup>5</sup>LGVKPTPKTEFLGVP<sup>6</sup>IVSHDISL<sup>7</sup>K↓LPKEFDARTAWSQCTSIGRIL<sup>8</sup>DQGHCGS<sup>9</sup>CWAFGA<sup>10</sup>  
VESLSDRFCIKYNM<sup>11</sup>NVSLSVNDLLACCGFLCGQGCNGGYPIAAWRYFKHHGVVTEECDPYFDNTGCS<sup>12</sup>H<sup>13</sup>  
PGCEPAYPTPKCARKCVSGNQLWRESKH<sup>14</sup>YGVSA<sup>15</sup>YKVRSH<sup>16</sup>PDDIMAEVYKNGPVEVAFTVYEDFAHYK<sup>17</sup>  
SGVYKHITGTNIGG<sup>18</sup>HAVKLIGWGTSDDGEDYWLLAN<sup>19</sup>QW<sup>20</sup>NR<sup>21</sup>SWGDDGYFKIRRG<sup>22</sup>TNECGIEH<sup>23</sup>GVVAGL<sup>24</sup>  
PSDRNVVKGITTSDDL<sup>25</sup>VSSF

AtCathB3:

MAVYNTKLCLASVFLLLGLLLA<sup>1</sup>FDLKGIEA<sup>2</sup>ESLTKQKLD<sup>3</sup>SKILQDEIVKKVNENPNAGWKA<sup>4</sup>AINDRFS<sup>5</sup>  
ATVAEFKRL<sup>6</sup>LGVKPTPKKH<sup>7</sup>FLGVP<sup>8</sup>IVSHDPSL<sup>9</sup>K↓LPKAFDARTAWPQCTSIGNILD<sup>10</sup>QGHCGS<sup>11</sup>CWAFGAV<sup>12</sup>  
ESLSDRFCIQFGM<sup>13</sup>NISLSVNDLLACCGFRCGDGCDGGYPIAAWQYFSYSGVVTEECDPYFDNTGCSHPG<sup>14</sup>  
CEPAYPTPKCSRKCVSDNKLWSESKHYSVSTYTVKSNPQDIMAEVYKNGPVEVSFTVYEDFAHYKSGV<sup>15</sup>  
YKHITGSNIGG<sup>16</sup>HAVKLIGWGTSS<sup>17</sup>EGEDYWLMA<sup>18</sup>NQWNRGWGDDGYFMIRRG<sup>19</sup>TNECGIEDEPVAGLPSS<sup>20</sup>  
KNVFRVDTGSNDLPVASV

Proregions are presented in magenta. Important active-site residues (yellow), potential N-glycosylation sites (green) and amino acids subjected to site-directed mutagenesis (cyan) are highlighted by coloured backgrounds. The N-termini of the catalytic domains are indicated by red arrows.

Table S3 Hydrolysis of peptidyl-MCA substrates by wild-type AtCathB2 and AtCathB3.

| Substrate           | AtCathB2 [mU/mg] | AtCathB3 [mU/mg] |
|---------------------|------------------|------------------|
| Z-Phe-Arg-MCA       | 78               | 69               |
| Z-Leu-Arg-MCA       | 28               | 70               |
| Boc-Val-Arg-MCA     | 10               | 69               |
| Z-Arg-Arg-MCA       | 1.0              | 30               |
| Bz-Phe-Val-Arg-MCA  | 77               | 155              |
| Z-Val-Val-Arg-MCA   | 40               | 274              |
| Z-Gly-Pro-Arg-MCA   | 0.6              | 10               |
| Boc-Val-Leu-Lys-MCA | 18               | 60               |
| Z-His-Glu-Lys-MCA   | 0.4              | 12               |

All substrates were tested at a final concentration of 10  $\mu$ M. mU, nmol per min.

Table S4 Oligonucleotide primers used in this study.

|              |                                         |
|--------------|-----------------------------------------|
| AtCathB1_fw  | 5'-GCCTCTGTTTTCTTGCTC-3'                |
| AtCathB1_rev | 5'-CAGGATTGATTCTGTATGCG-3'              |
| AtCathB2_fw  | 5'-GAATCTAGAGAAAATCTTTCCAAGCAG-3'       |
| AtCathB2_rev | 5'-AAAGGTACCTTAAAATGAGGAAACAAGAAGATC-3' |
| AtCathB3_fw  | 5'-GACTCTAGAGAAAGTCTTACCAAAC-3'         |
| AtCathB3_rev | 5'-ACAGGTACCTTAAACCGATGCAACCG-3'        |
| D127A_fw     | 5'-ATTGGAAGGATCTTAGCTCAGGGTCACTGTGGT-3' |
| D127A_rev    | 5'-ACCACAGTGACCCTGAGCTAAGATCCTTCCAAT-3' |
| H207A_fw     | 5'-AATACTGGTTGCTCGGCCCCGGGATGTGAACCC-3' |
| H207A_rev    | 5'-GGGTTCACATCCCGGGGCCGAGCAACCAGTATT-3' |
| G336E_fw     | 5'-TGTGGCATTGAACATGAGGTTGTAGCTGGTTTA-3' |
| G336E_rev    | 5'-TAAACCAGCTACAACCTCATGTTCAATGCCACA-3' |

Figure S1 Sequence alignment of the catalytic domains of AtCathB2, AtCathB3, rat and human cathepsin B.

|          |   |                                                                |
|----------|---|----------------------------------------------------------------|
| AtCathB2 | 1 | LPKEFDARTAWSQCTSIGRILDQGHCGSCWAFGAVESLSDRECIKYN--MNVSLSVNDLL   |
| AtCathB3 | 1 | LPKAFDARTAWPQCTSIGNILDQGHCGSCWAFGAVESLSDRECIQFG--MNLISLVNDLL   |
| RnCathB  | 1 | LPESFDAREQWSNCPTIAQIRDQGS CGSCWAFGAVEAMSDRICIHTNGRVNVEVSAEDLL  |
| HsCathB  | 1 | LPASFDAREQWPQCPTIKEIRDQGS CGSCWAFGAVEAISDRICIHTNAHVSVVEVSAEDLL |

  

|          |    |                                                               |
|----------|----|---------------------------------------------------------------|
| AtCathB2 | 59 | ACCGFLCGQGCNGGYPIAAWRYFKHHGVVTE-----ECDPYFDNTGCSH-----PGC     |
| AtCathB3 | 59 | ACCGFRCGDGCDGGYPIAAWQYFSYSGVVTE-----ECDPYFDNTGCSH-----PGC     |
| RnCathB  | 61 | TCCGIQCGDGCNGGYPSGAWNFWTRKGLVSGGVYNISHIGCLPY-TIPPCEHHVNGSRPPC |
| HsCathB  | 61 | TCCGSMCGDGCNGGYPAEAWNFWTRKGLVSGGLYESHVGC RPY-SIPPCEHHVNGSRPPC |

  

|          |     |                                                                 |
|----------|-----|-----------------------------------------------------------------|
| AtCathB2 | 106 | EPAYPTPKCARKCVSGNQ-LWRESKHYGVSAYKVRSHPD DIMAEVYKNGPVEVAF TVYED  |
| AtCathB3 | 106 | EPAYPTPKCSRKCVSDNK-LWSESKHYSVSTYTVKSNPQD DIMAEVYKNGPVEVSE TVYED |
| RnCathB  | 120 | TGEGDTPKCNKMCEAGYSTSYKEDKHYGYTSYSVSDSEKE IMAEIVYKNGPVEGAF TVESD |
| HsCathB  | 120 | TGEGDTPKCSKICEPGYSPTYKQDKHYGYNSYSVSNSEK DIMAEIVYKNGPVEGAF SVYSD |

  

|          |     |                                                                |
|----------|-----|----------------------------------------------------------------|
| AtCathB2 | 165 | FAHYKSGVYKHITGTNIGGHAVKLI GWGTSDDGEDYWLLANQOWNRSWGDDGYFKIRRGTN |
| AtCathB3 | 165 | FAHYKSGVYKHITGSNIGGHAVKLI GWGTSSEGEDYWLMANQOWNRGWGDDGYFMIRRGTN |
| RnCathB  | 180 | FLTYKSGVYKHEAGDVMGGHAIRILGWGI-ENGVPYWLVANSWNVWDGDNCEFFKILRGEN  |
| HsCathB  | 180 | FLLYKSGVYQHVTGEMMGGHAIRILGWGV-ENGTPYWLVANSWNTDWGDNCEFFKILRGQD  |

  

|          |     |                                   |
|----------|-----|-----------------------------------|
| AtCathB2 | 225 | ECGIEHGVVAGLPSDRNVVKGITTSDDLVSSEF |
| AtCathB3 | 225 | ECGIEDEPVAGLPSSKNVERVDTGSDNLPVASV |
| RnCathB  | 239 | HCGIESEIVAGIPRTQQYWGRF-----       |
| HsCathB  | 239 | HCGIESEVVAGIPRTDQYWEKI-----       |

Important active-site residues are highlighted by black triangles. The occluding loop of human cathepsin B (HsCathB) is underlined, and the two histidines contributing to its exopeptidase activity are marked with asterisks. Amino acids contributing to the S2 and S1' subsites are indicated with black circles and white triangles, respectively. RnCathB, rat cathepsin B.

Figure S2 Analysis of AtCathB2 N-glycosylation site occupancy.

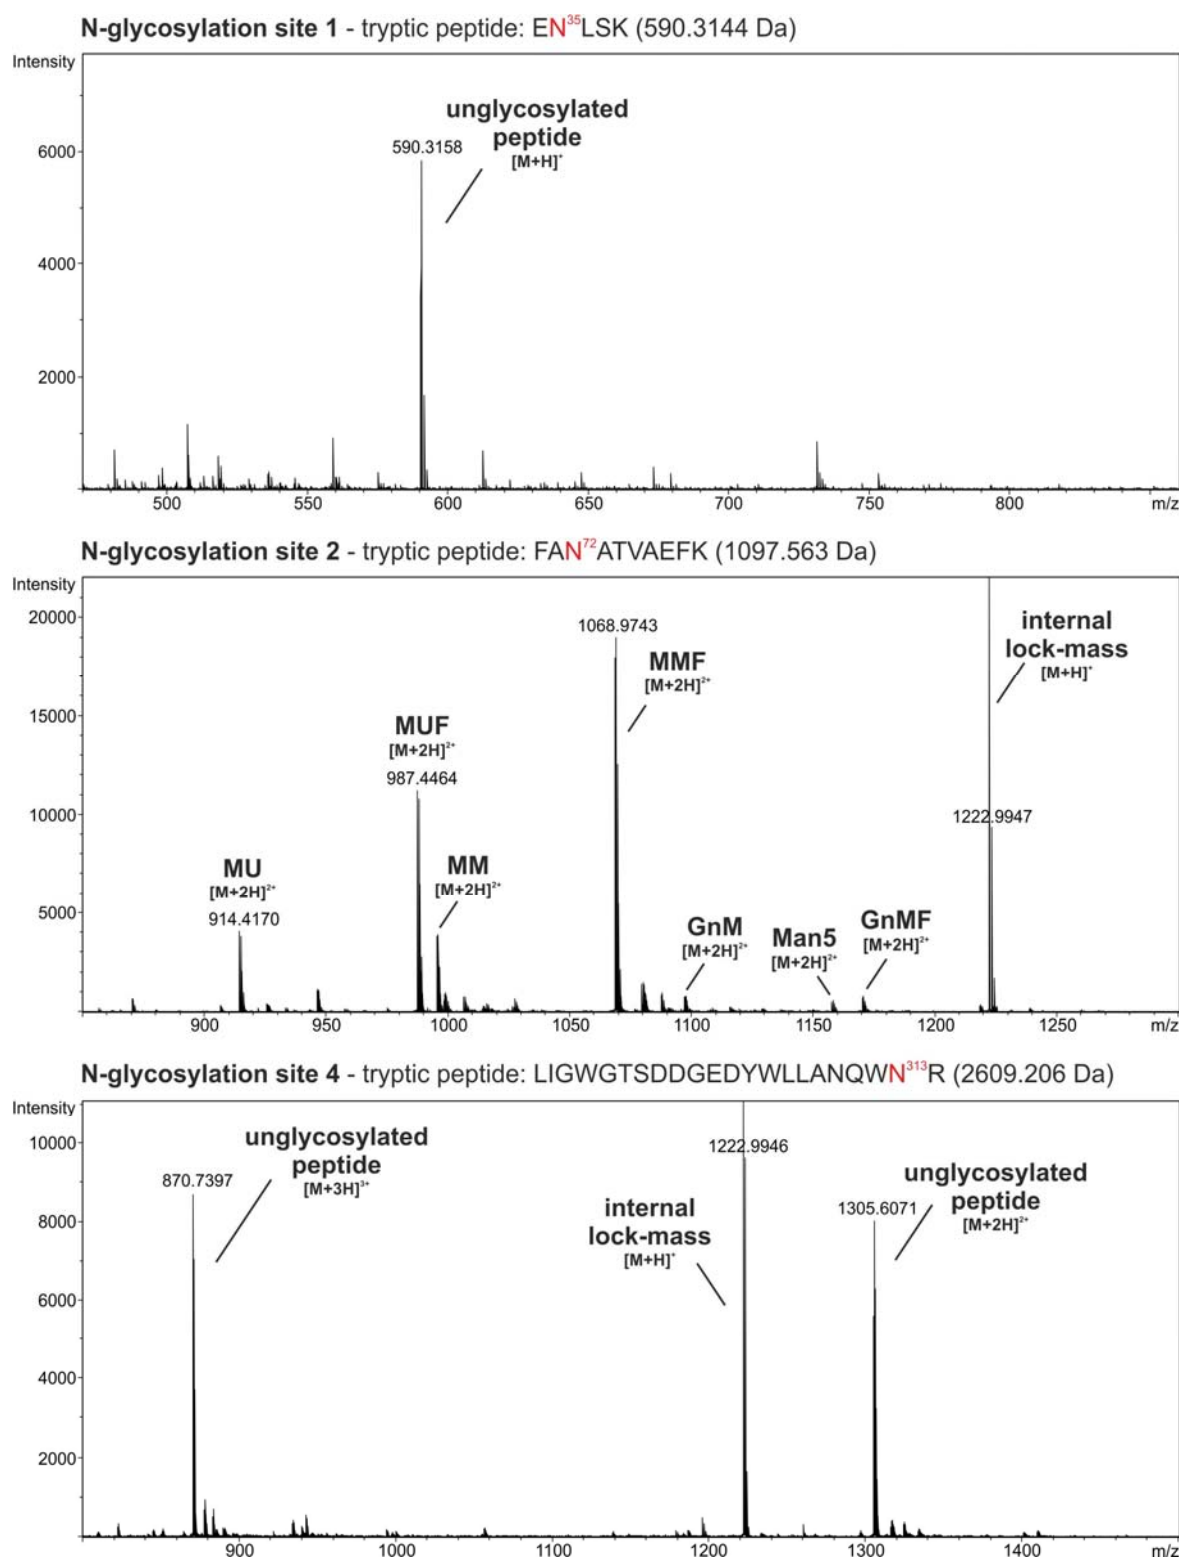

The tryptic peptide containing Asn<sup>154</sup> (N-glycosylation site 3) could not be identified. MU, Man<sub>2</sub>GlcNAc<sub>2</sub>; MUF, Man<sub>2</sub>GlcNAc<sub>2</sub>Fuc; MM, Man<sub>3</sub>GlcNAc<sub>2</sub>; MMF, Man<sub>3</sub>GlcNAc<sub>2</sub>Fuc; GnM, Man<sub>3</sub>GlcNAc<sub>3</sub>; Man5, Man<sub>5</sub>GlcNAc<sub>2</sub>; GnMF, Man<sub>3</sub>GlcNAc<sub>3</sub>Fuc. See [www.proglycan.com](http://www.proglycan.com) for linkage details of the detected N-glycan forms.

Figure S3 Distances between key residues of AtCathB2.

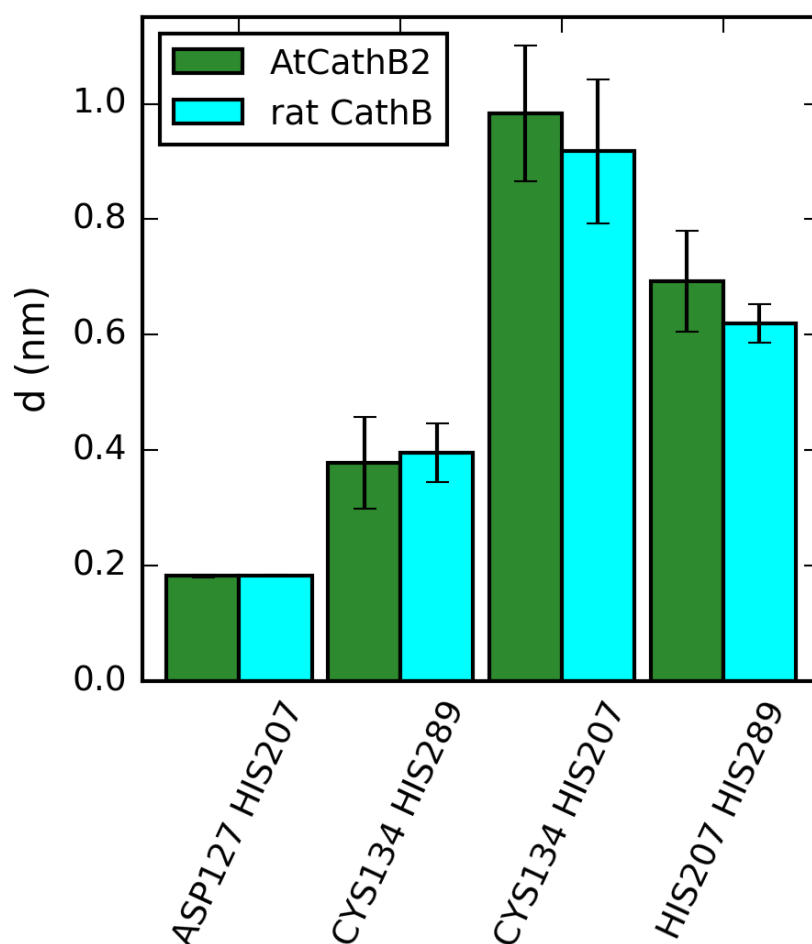

Residues are numbered according to the AtCathB2 preproprotein sequence. Note that only the carboxyl group of Asp<sup>127</sup>, the sulphur atom of Cys<sup>134</sup> and the imidazole rings of His<sup>207</sup> and His<sup>289</sup> were used to define the minimal distances (d) between the respective amino acids. The equivalent residues in mature rat cathepsin B (CathB) are Asp<sup>22</sup>, Cys<sup>29</sup>, His<sup>110</sup> and His<sup>199</sup>.
